# Supplementary material for: Genus-Wide Screening Reveals Four Distinct Types of Structural Plastid Genome Organization in Pelargonium (Geraniaceae)
Source: PubMed Central journal article supplement — Genome Biol Evol. 2016 Nov 15;9(1):64–76. doi: 10.1093/gbe/evw271 (PMC5381562; doi:10.1093/gbe/evw271), 2016-11-15
Supplement: evw271_Supp.pdf [file evw271_Supp.pdf]

## Supporting Informations

### Röschenbleck et al., – Genus-wide screening reveals four distinct types of structural plastid genome organization in *Pelargonium* (Geraniaceae)

#### Supplemental Figures

**Fig. S1** Microstructural variation in selected plastome regions in *Pelargonium*.

**Fig. S2** Data set summary statistics.

#### Supplemental Tables

**Table S1** Specimens studied and results of the PCR- and sequencing results with GenBank accessions.

**Table S2** PCR screening and sequencing details for clades and regions.

**Table S3** PCR settings including primer primers used in PCR screening and sequencing.

**Table S4** Reconstructed gene order of 111 unique plastid genes in *Pelargonium*.

**Table S5** Length range and mean (brackets) for 10 plastome regions of *Pelargonium*.

**Table S6** Substitution rate, nucleotide divergence and GC-content in unaltered and rearranged plastome regions.

**Table S7** Average length, number, and proportion [%] of repeat-rich segments of accD-like regions.

**Table S8** Summary statistics of sequence comparison for accD segments from blastN analysis.

## Supplemental Figures

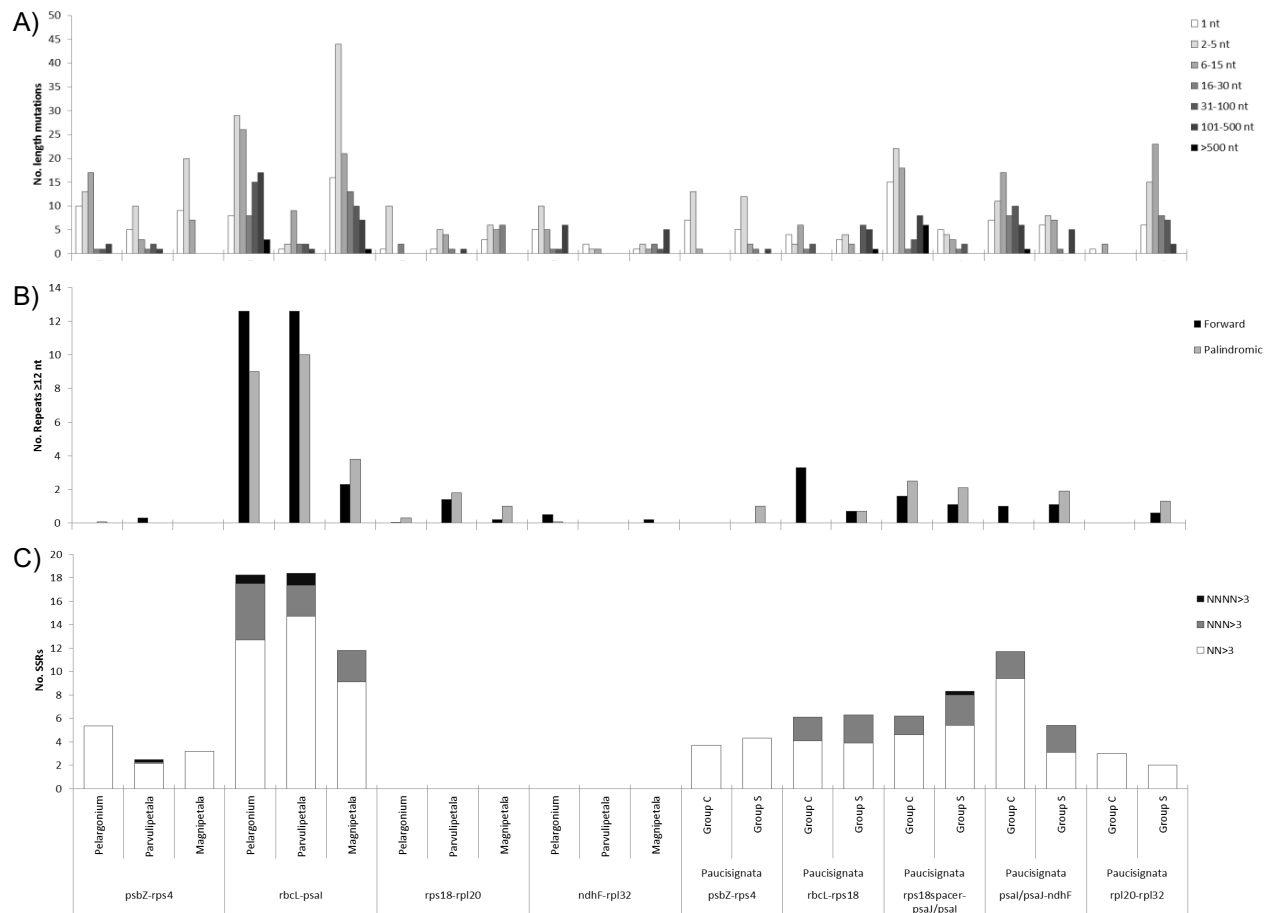

**Fig. S1 Microstructural variation in selected plastome regions in *Pelargonium*.** (A) Number of length mutations in seven different size classes. (B) Average number of forward and palindromic repeats of at least 12nt length. (C) di-, tri- and tetramer SSRs of at least three repetitions. Note that original data including more detailed metrics (e.g. standard deviations) are deposited in datadryad.org (doi: XXXXXX).

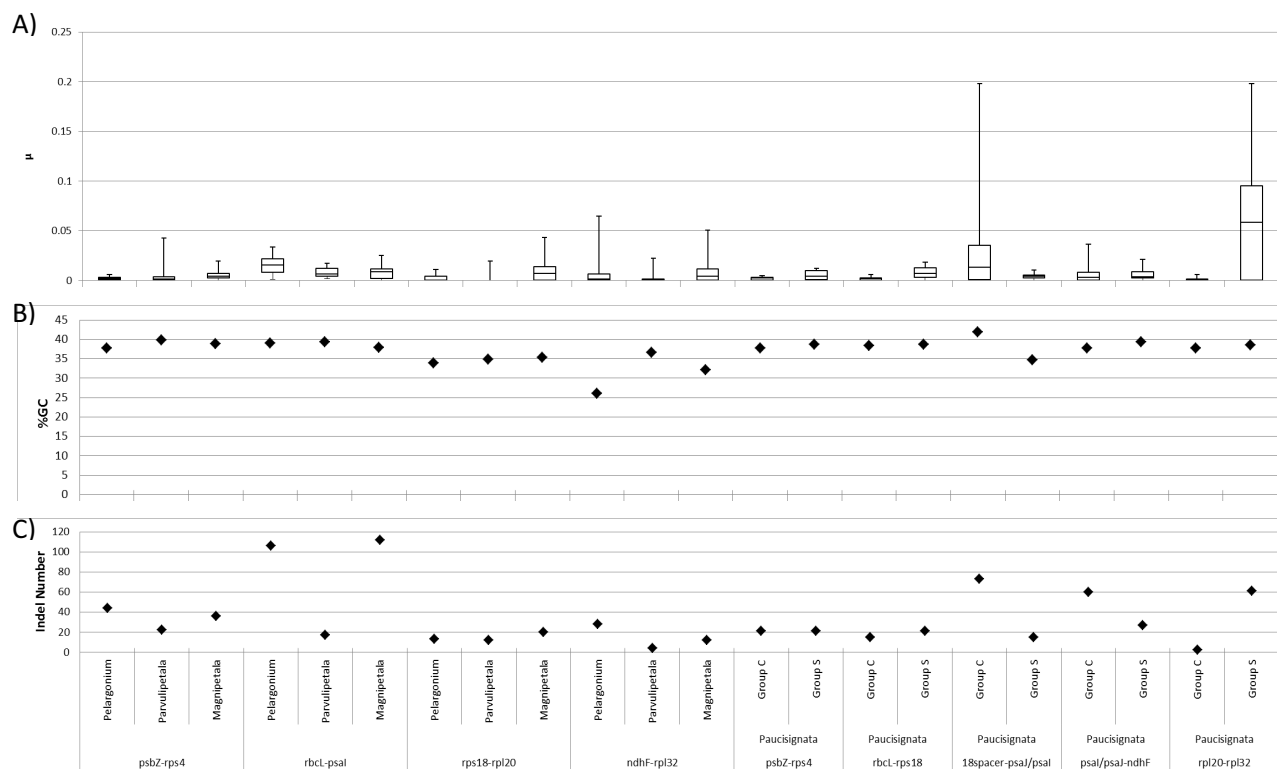

**Fig. S2 Data set summary statistics. (a)** Nucleotide substitution rates, **(b)** GC content, and **(c)** indel number are given for all regions of the subgenera *Pelargonium*, *Parvulipetala*, *Magnipetala*, and subgroups C and S of *Paucisignata*.



|                                                                       |        |        |        |        |   |        |        |        |        |        |        |        |        |   |   |  |
|-----------------------------------------------------------------------|--------|--------|--------|--------|---|--------|--------|--------|--------|--------|--------|--------|--------|---|---|--|
| <i>P. trifidum</i> Jacq.,<br>MSUN 3179                                | GB-Nr. | GB-Nr. | GB-Nr. | GB-Nr. | - | -      | -      | -      | -      | -      | -      | -      | -      | - | - |  |
| <i>P. worcesterae</i> R.<br>Knuth, MSUN 2746                          | GB-Nr. | GB-Nr. | GB-Nr. | GB-Nr. | - | -      | -      | -      | -      | -      | -      | -      | -      | - | - |  |
| <b><i>Paucisignata, Grp C</i></b>                                     |        |        |        |        |   |        |        |        |        |        |        |        |        |   |   |  |
| <i>P. acetosum</i> (L.)<br>L'Hér., MSUN 526                           | GB-Nr. | -      | -      | -      | - | GB-Nr. | GB-Nr. | GB-Nr. | -      | -      | GB-Nr. | GB-Nr. | GB-Nr. | - | - |  |
| <i>P. barklyi</i> Scott-Elliot,<br>MSUN 4037                          | GB-Nr. | -      | -      | -      | - | GB-Nr. | GB-Nr. | GB-Nr. | -      | -      | GB-Nr. | GB-Nr. | GB-Nr. | - | - |  |
| <i>P. inquinans</i> (L.)<br>L'Hér., MSUN 530                          | GB-Nr. | -      | -      | -      | - | GB-Nr. | GB-Nr. | GB-Nr. | -      | -      | GB-Nr. | GB-Nr. | GB-Nr. | - | - |  |
| <i>P. multibracteatum</i><br>Hochstetter ex A.<br>Rich., MSUN 2727    | GB-Nr. | -      | -      | -      | - | GB-Nr. | GB-Nr. | GB-Nr. | -      | -      | GB-Nr. | GB-Nr. | GB-Nr. | - | - |  |
| <i>P. peltatum</i> (L.)<br>L'Hér., MSUN 534                           | GB-Nr. | -      | -      | -      | - | GB-Nr. | GB-Nr. | GB-Nr. | -      | -      | GB-Nr. | GB-Nr. | GB-Nr. | - | - |  |
| <i>P. ranunculophyllum</i><br>(Eckl. & Zeyh.) Bak.,<br>MSUN 2375      | GB-Nr. | -      | -      | -      | - | GB-Nr. | GB-Nr. | GB-Nr. | -      | -      | GB-Nr. | GB-Nr. | GB-Nr. | - | - |  |
| <i>P. tongaense</i> Vorster,<br>MSUN 4031                             | GB-Nr. | -      | -      | -      | - | GB-Nr. | GB-Nr. | GB-Nr. | -      | -      | GB-Nr. | GB-Nr. | GB-Nr. | - | - |  |
| <b><i>Paucisignata, Grp S</i></b>                                     |        |        |        |        |   |        |        |        |        |        |        |        |        |   |   |  |
| <i>P. caylae</i> Humbert,<br>MSUN 477                                 | GB-Nr. | -      | -      | -      | - | GB-Nr. | GB-Nr. | -      | GB-Nr. | GB-Nr. | -      | GB-Nr. | GB-Nr. | - | - |  |
| <i>P. endlicherianum</i><br>Fenzl, no voucher,<br>s.loc., cult. BG MS | GB-Nr. | -      | -      | -      | - | GB-Nr. | GB-Nr. | -      | GB-Nr. | GB-Nr. | -      | GB-Nr. | GB-Nr. | - | - |  |
| <i>P. grandicalcaratum</i><br>R. Knuth, STEU 758                      | GB-Nr. | -      | -      | -      | - | GB-Nr. | GB-Nr. | -      | GB-Nr. | GB-Nr. | -      | GB-Nr. | GB-Nr. | - | - |  |
| <i>P. karooicum</i><br>Compton, MSUN 4040                             | GB-Nr. | -      | -      | -      | - | GB-Nr. | GB-Nr. | -      | GB-Nr. | GB-Nr. | -      | GB-Nr. | GB-Nr. | - | - |  |
| <i>P. otaviense</i> R. Knuth,<br>STEU 943                             | GB-Nr. | -      | -      | -      | - | GB-Nr. | GB-Nr. | -      | GB-Nr. | GB-Nr. | -      | GB-Nr. | GB-Nr. | - | - |  |

|                                                                                        |        |        |        |   |        |        |        |   |        |        |   |        |        |   |   |
|----------------------------------------------------------------------------------------|--------|--------|--------|---|--------|--------|--------|---|--------|--------|---|--------|--------|---|---|
| <i>P. spinosum</i> Willd.,<br>STEU 619                                                 | GB-Nr. | -      | -      | - | -      | GB-Nr. | GB-Nr. | - | GB-Nr. | GB-Nr. | - | GB-Nr. | GB-Nr. | - | - |
| <i>P. transvaalense</i><br>R.Knuth, STEU 1972                                          | GB-Nr. | -      | -      | - | -      | GB-Nr. | GB-Nr. | - | GB-Nr. | GB-Nr. | - | GB-Nr. | GB-Nr. | - | - |
| <b><i>Parvulipetala</i></b>                                                            |        |        |        |   |        |        |        |   |        |        |   |        |        |   |   |
| <i>P. anceps</i> subsp.<br>nov. ined. ' <i>geniculatum</i> ',<br>MSUN 430              | GB-Nr. | GB-Nr. | GB-Nr. | - | GB-Nr. | -      | -      | - | -      | -      | - | -      | -      | - | - |
| <i>P. album</i> J.J.A. v.d.<br>Walt, MSUN 669                                          | GB-Nr. | n.a.   | GB-Nr. | - | GB-Nr. | -      | -      | - | -      | -      | - | -      | -      | - | - |
| <i>P. australe</i> Willd.,<br>MSUN 375                                                 | GB-Nr. | n.a.   | GB-Nr. | - | GB-Nr. | -      | -      | - | -      | -      | - | -      | -      | - | - |
| <i>P. cotyledonis</i> (L.)<br>L'Hér., MSUN 4030                                        | GB-Nr. | n.a.   | GB-Nr. | - | GB-Nr. | -      | -      | - | -      | -      | - | -      | -      | - | - |
| <i>P. exstipulatum</i> (Cav.)<br>L'Hér., MSUN 656                                      | GB-Nr. | GB-Nr. | GB-Nr. | - | GB-Nr. | -      | -      | - | -      | -      | - | -      | -      | - | - |
| <i>P. filicaule</i> R. Knuth,<br>MSUN 310                                              | GB-Nr. | GB-Nr. | GB-Nr. | - | GB-Nr. | -      | -      | - | -      | -      | - | -      | -      | - | - |
| <i>P. ionidiflorum</i> (Eckl.<br>& Zeyh.) Steud.,<br>MSUN 673                          | GB-Nr. | n.a.   | GB-Nr. | - | GB-Nr. | -      | -      | - | -      | -      | - | -      | -      | - | - |
| <i>P. littorale</i> Hügel,<br>MSUN 249                                                 | GB-Nr. | n.a.   | GB-Nr. | - | GB-Nr. | -      | -      | - | -      | -      | - | -      | -      | - | - |
| <i>P. minimum</i> (Cav.)<br>Willd., STEU 4361                                          | GB-Nr. | n.a.   | GB-Nr. | - | GB-Nr. | -      | -      | - | -      | -      | - | -      | -      | - | - |
| <i>P. pseudofumaroides</i><br>R.Knuth, STEU 2981                                       | GB-Nr. | n.a.   | GB-Nr. | - | n.a.   | -      | -      | - | -      | -      | - | -      | -      | - | - |
| <i>P. reniforme</i> subsp.<br><i>velutinum</i> (Eckl. &<br>Zeyh.) Dreyer, MSUN<br>2721 | GB-Nr. | n.a.   | GB-Nr. | - | GB-Nr. | -      | -      | - | -      | -      | - | -      | -      | - | - |
| <i>P. sidoides</i> DC.,<br>MSUN 2666                                                   | GB-Nr. | n.a.   | GB-Nr. | - | GB-Nr. | -      | -      | - | -      | -      | - | -      | -      | - | - |
| <b><i>Pelargonium</i></b>                                                              |        |        |        |   |        |        |        |   |        |        |   |        |        |   |   |



|                                                                               |        |        |        |        |   |   |   |   |   |   |   |   |   |        |        |
|-------------------------------------------------------------------------------|--------|--------|--------|--------|---|---|---|---|---|---|---|---|---|--------|--------|
| <i>P. magenteum</i> J.J.A.<br>v.d. Walt, MSUN 631                             | GB-Nr. | GB-Nr. | GB-Nr. | GB-Nr. | - | - | - | - | - | - | - | - | - | GB-Nr. | GB-Nr. |
| <i>P. nanum</i> L'Hér.,<br>MSUN 345                                           | GB-Nr. | n.a.   | GB-Nr. | GB-Nr. | - | - | - | - | - | - | - | - | - | GB-Nr. | GB-Nr. |
| <i>P. oblongatum</i> E.Mey.<br>ex. Harv., MSUN 4027                           | GB-Nr. | n.a.   | GB-Nr. | GB-Nr. | - | - | - | - | - | - | - | - | - | GB-Nr. | GB-Nr. |
| <i>P. ovale</i> subsp. <i>ovale</i><br>(Burm.f.) L'Hér., BG<br>Muenster, s.n. | GB-Nr. | GB-Nr. | GB-Nr. | GB-Nr. | - | - | - | - | - | - | - | - | - | GB-Nr. | GB-Nr. |
| <i>P. radulifolium</i> (Eckl.<br>& Zeyh.) Steud.,<br>MSUN 874                 | GB-Nr. | n.a.   | GB-Nr. | GB-Nr. | - | - | - | - | - | - | - | - | - | GB-Nr. | GB-Nr. |
| <i>P. schizopetalum</i><br>Sweet, STEU 1873                                   | GB-Nr. | n.a.   | GB-Nr. | GB-Nr. | - | - | - | - | - | - | - | - | - | GB-Nr. | GB-Nr. |
| <i>P. sericifolium</i> J.J.A.<br>v.d. Walt, STEU 1554                         | GB-Nr. | n.a.   | GB-Nr. | GB-Nr. | - | - | - | - | - | - | - | - | - | GB-Nr. | GB-Nr. |
| <i>P. triandrum</i> E.M.<br>Marais, MSUN 751                                  | GB-Nr. | n.a.   | GB-Nr. | GB-Nr. | - | - | - | - | - | - | - | - | - | GB-Nr. | GB-Nr. |
| <i>P. triste</i> (L.) L'Hér.,<br>STEU 1103                                    | GB-Nr. | GB-Nr. | GB-Nr. | GB-Nr. | - | - | - | - | - | - | - | - | - | GB-Nr. | GB-Nr. |
| <i>P. xerophyton</i> Schltr.<br>ex R. Knuth, MSUN<br>636                      | GB-Nr. | n.a.   | GB-Nr. | GB-Nr. | - | - | - | - | - | - | - | - | - | GB-Nr. | GB-Nr. |

‘-’: not detected; ‘n. a.’: positive result in PCR screening, but not sequenced; MSUN – Herbarium of the University of Muenster; STEU – Herbarium of the University of Stellenbosch; BG – Botanical Garden



**Table S2.** PCR screening and sequencing details for clades and regions.

| <b>Amplicon</b>                                 | <b>No. species</b> | <b>Additional amplicons of flanking genes</b>                                                                                                                                       | <b>Negative control (amplification region)</b>                                                         |
|-------------------------------------------------|--------------------|-------------------------------------------------------------------------------------------------------------------------------------------------------------------------------------|--------------------------------------------------------------------------------------------------------|
| <b><i>Pelargonium</i></b>                       |                    |                                                                                                                                                                                     |                                                                                                        |
| <i>rpoA-petB</i>                                | 24 (24)            | -                                                                                                                                                                                   | <i>rbcL</i> (IRa) rev - <i>psbA</i> for, <i>rbcL</i> (IRa) rev- <i>trnI</i> <sub>CAU</sub> rev         |
| <i>ycf2-rpoA</i>                                | 24 (24)            | -                                                                                                                                                                                   | <i>rbcL</i> (IRa) rev - <i>psbA</i> for, <i>rbcL</i> (IRa) rev- <i>trnI</i> <sub>CAU</sub> rev         |
| <i>ycf3</i> rev- <i>trnE</i> <sub>UUC</sub> rev | 10 (5)             | <i>ycf3</i> rev- <i>trnG</i> <sub>GCC</sub> rev, <i>trnG</i> <sub>GCC</sub> for- <i>trnE</i> <sub>UUC</sub> rev                                                                     | -                                                                                                      |
| <i>psbZ</i> for- <i>rps4</i> for                | 31 (24)            | -                                                                                                                                                                                   | <i>rps4</i> for- <i>ycf3</i> rev                                                                       |
| <i>rbcL</i> for- <i>psaI</i> rev                | 31 (9)             | -                                                                                                                                                                                   | <i>rbcL</i> for - <i>psaJ</i> rev                                                                      |
| <i>rps18</i> for- <i>rpl20</i> for              | 28 (24)            | <i>psaJ</i> for- <i>rpl20</i> for, <i>psaJ</i> for- <i>rps18</i> rev                                                                                                                | -                                                                                                      |
| <i>ndhF</i> rev- <i>rpl32</i> rev               | 29 (24)            | -                                                                                                                                                                                   | <i>ndhF</i> for- <i>rpl32</i> rev                                                                      |
| <b><i>Parvulipetala</i> -</b>                   |                    |                                                                                                                                                                                     |                                                                                                        |
| -                                               | -                  | -                                                                                                                                                                                   | <i>rbcL</i> (IRa) rev - <i>psbA</i> for, <i>rbcL</i> (IRa) rev- <i>trnI</i> <sub>CAU</sub> rev         |
| <i>psbZ</i> for- <i>rps4</i> for                | 12 (12)            | -                                                                                                                                                                                   | <i>rps4</i> for- <i>ycf3</i> rev                                                                       |
| <i>rbcL</i> for- <i>psaI</i> rev                | 15 (3)             | -                                                                                                                                                                                   | <i>rbcL</i> for- <i>rps18</i> rev, <i>rbcL</i> for- <i>psaJ</i> for                                    |
| <i>rps18</i> for- <i>rpl20</i> for              | 16 (12)            | <i>psaJ</i> for- <i>rpl20</i> for, <i>psaJ</i> for- <i>rps18</i> rev                                                                                                                | <i>rpl20</i> for- <i>rpl32</i> for                                                                     |
| <i>ndhF</i> for- <i>rpl32</i> rev               | 13 (11)            | -                                                                                                                                                                                   | <i>ndhF</i> rev- <i>rpl32</i> rev                                                                      |
| <b><i>Magnipetala</i></b>                       |                    |                                                                                                                                                                                     |                                                                                                        |
| <i>ycf3</i> rev- <i>trnE</i> <sub>UUC</sub> rev | 9 (2)              | <i>ycf3</i> rev- <i>trnG</i> <sub>GCC</sub> rev, <i>ycf3</i> rev- <i>trnY</i> <sub>GUA</sub> rev                                                                                    | -                                                                                                      |
| <i>psbZ</i> for- <i>rps4</i> for                | 15 (10)            | -                                                                                                                                                                                   | <i>rps4</i> for- <i>ycf3</i> rev                                                                       |
| <i>rbcL</i> for- <i>psaI</i> rev                | 15 (10)            | -                                                                                                                                                                                   | <i>rbcL</i> for- <i>rps18</i> rev, <i>trnN</i> <sub>GUU</sub> for- <i>psaI</i> rev                     |
| <i>rps18</i> for- <i>rpl20</i> for              | 16 (10)            | <i>psaJ</i> for- <i>rpl20</i> for, <i>psaJ</i> for- <i>rps18</i> rev                                                                                                                | <i>rpl20</i> for- <i>rpl32</i> for                                                                     |
| <i>ndhF</i> rev- <i>rpl32</i> rev               | 16 (10)            | <i>ndhF</i> for- <i>trnN</i> <sub>GUU</sub> rev                                                                                                                                     | <i>ndhF</i> for- <i>trnN</i> <sub>GUU</sub> for, <i>ndhF</i> rev- <i>rpl32</i> rev                     |
| <b><i>Paucisignata</i></b>                      |                    |                                                                                                                                                                                     |                                                                                                        |
| <i>rbcL</i> (IRa) rev- <i>psbA</i> for          | 14 (0)             | <i>rbcL</i> (IRa) rev- <i>trnI</i> <sub>CAU</sub> rev                                                                                                                               | -                                                                                                      |
| <i>ycf3</i> rev- <i>trnE</i> <sub>UUC</sub> rev | 11 (8)             | <i>ycf3</i> rev- <i>trnG</i> <sub>GCC</sub> rev, <i>trnG</i> <sub>GCC</sub> for- <i>trnE</i> <sub>UUC</sub> rev                                                                     | -                                                                                                      |
| <i>psbZ</i> for- <i>rps4</i> for                | 14 (14)            | -                                                                                                                                                                                   | <i>rps4</i> for- <i>ycf3</i> rev                                                                       |
| <i>rbcL</i> for (IRb)- <i>rps18</i> rev         | 17 (14)            | -                                                                                                                                                                                   | -                                                                                                      |
| <i>rpl20</i> rev- <i>rpl32</i> rev              | 15 (14)            | -                                                                                                                                                                                   | <i>ndhF</i> rev- <i>rpl32</i> rev                                                                      |
| <b><i>Paucisignata – Grp. C</i></b>             |                    |                                                                                                                                                                                     |                                                                                                        |
| <i>rps18</i> for- <i>psaJ</i> for               | 9 (7)              | <i>rbcL</i> for - <i>psaJ</i> for                                                                                                                                                   | <i>rps18</i> for- <i>psaI</i> rev                                                                      |
| <i>ndhF</i> for- <i>psaI</i> rev                | 7 (7)              | <i>ndhF</i> for- <i>trnN</i> <sub>GUU</sub> rev, <i>trnN</i> <sub>GUU</sub> for- <i>psaI</i> rev                                                                                    | <i>ndhF</i> for- <i>psaJ</i> for, <i>ndhF</i> for- <i>rps18</i> for, <i>rps18</i> rev- <i>psaJ</i> for |
| <b><i>Paucisignata – Grp. S</i></b>             |                    |                                                                                                                                                                                     |                                                                                                        |
| <i>rps18</i> for - <i>psaI</i> rev              | 7 (7)              | <i>rbcL</i> for- <i>psaI</i> rev                                                                                                                                                    | <i>rps18</i> for- <i>psaJ</i> for                                                                      |
| <i>ndhF</i> for- <i>psaJ</i> for                | 7 (7)              | <i>ndhF</i> for- <i>trnN</i> <sub>GUU</sub> rev, <i>trnN</i> <sub>GUU</sub> for- <i>psaJ</i> for, <i>ndhF</i> for- <i>psaI</i> rev, <i>trnN</i> <sub>GUU</sub> for- <i>psaI</i> rev | <i>trnN</i> <sub>GUU</sub> for- <i>rps18</i> for, <i>rps18</i> rev- <i>psaJ</i> for                    |

Numbers in brackets in column 2 are the number of species sequences. for – forward primer, rev – reverse primer;

**Table S3.** PCR settings including primer primers used in PCR screening and sequencing.

| Region           | Primer <sup>1</sup> | Primer sequence 5'→3'          | Orientation | Cycles, Annealing, Elongation conditions |
|------------------|---------------------|--------------------------------|-------------|------------------------------------------|
| <i>rbcL-psbA</i> | rbcL-A              | GTATCCTTGGTTTCATAATCAGG        | Rev         | 43 x, A 60°C 30sec, E 72°C 1m            |
|                  | psbA                | CCTTGGTATGGAAGTTATGCATG        | Rev         |                                          |
|                  | rbcL-A              | GTATCCTTGGTTTCATAATCAGG        | Rev         | 43 x, A 60°C 30sec, E 72°C 1m            |
|                  | trnI                | GTTGGGTGCTTTAACCATTTCAGC       | Rev         |                                          |
| <i>psbZ-rps4</i> | rps4                | CATAGAATATTATTCTCGTCAGATTTACCC | For         | 40x, A 54°C 0,45m, E 72°C 1,5m           |
|                  | psbZ                | GTACCCGTTGTATTTGCTTCTC         | For         | 45x, A 54°C 0,45m, E 72°C 1,5m           |
|                  | rps4                | CATAGAATATTATTCTCGTCAGATTTACCC | For         | 40x, A 54°C 0,45m, E 72°C 1,5m           |
|                  | ycf3                | GGTCTTATCAATAAAAATTTCCATT      | Rev         |                                          |
| <i>trnE-ycf3</i> | ycf3                | GGTCTTATCAATAAAAATTTCCATT      | Rev         | 45x, A 54°C 1m, E 72°C 2m                |
|                  | trnE                | GAGAGATGTCTGAACCACTAGACGATG    | Rev         | 45x, A 56°C 1m, E 72°C 2,15m             |
|                  | ycf3-2              | GCCTCCCTTTCTCCTGAAGTTGTAGG     | Rev         | 45x, A 54°C 1m, E 72°C 2,15m             |
|                  | trnG                | TCTCTTTGCCAAGGAGAAGACG         | For         | 40x, A 54°C 0.45m, E 72°C 2,15m          |
|                  | ycf3                | GGTCTTATCAATAAAAATTTCCATT      | Rev         | 38x, A54°C 0,45m, E 72°C 1,15m           |
|                  | trnG                | CGTCTTCTCCTTGGCAAAGAGA         | Rev         |                                          |
| <i>rbcL-psaI</i> | rbcL-B              | GAAGCATGTGTACAAGCTCGTAATG      | For         | 38 x, A 54°C 1,5m, E 72°C 3,5m; 4m; 4,5m |
|                  | psaI                | TGAAGAAATAAAGAAGCCATTGC        | Rev         | 45 x, A 54°C 1,5m, E 72°C 3,5m; 4m; 4,5m |
|                  | rbcL-B2             | GTGCCGTAGCTAATCGAGTAGC         | For         | 45x, A 54°C 1m, E 72°C 2m                |
|                  | IR-1                | TCAATTACTCTTTTACCTGCAAATGCAAT  | Rev         | 45x, A 56°C 1m, E 72°C 2m                |
|                  | IR-2.1              | GATTGAAATCGGGATCACCGCTTAC      | Rev         |                                          |
|                  | IR-2.2              | CTCTGAAGAGTCTTCAGATTTGT        | Rev         |                                          |
|                  | psaI2               | GCAAATGCCGAAATACTAGGC          | Rev         |                                          |
|                  | RI-1.1              | ACGTCCTTTTCGTTTCGTGTTGC        | For         | 45x, A 58°C 1m, E 72°C 2m                |
|                  | RI-2                | CATAATCCTAGTGATTGGATTTATATAC   | For         | 45x, A 58°C 1m, E 72°C 1,5m              |
|                  | RI-1.2              | TGTTTCCCCTTTGATTTCAAGTTGA      | For         |                                          |
|                  | RI-3                | GTTGACAAAGGTCTCTATATTCACTATAC  | For         |                                          |
|                  | RI-4                | GACTTCTACTTATGAAGAACTCAATTGTG  | For         |                                          |
|                  | IR-2.2              | CTCTGAAGAGTCTTCAGATTTGT        | Rev         |                                          |
|                  | RI-8                | ACAAATCTGAAGACTCTTCAGAG        | For         | 45x, A 58°C 1m, E 72°C 2m                |
|                  | RI-4                | GACTTCTACTTATGAAGAACTCAATTGTG  | For         |                                          |
|                  | psaI                | TGAAGAAATAAAGAAGCCATTGC        | Rev         |                                          |
|                  | RI-1.1              | ACGTCCTTTTCGTTTCGTGTTGC        | For         | 45x, A58°C 0,45m, E 72°C 1,5m            |
|                  | RI-1.2              | TGTTTCCCCTTTGATTTCAAGTTGA      | For         |                                          |
|                  | RI-3                | GTTGACAAAGGTCTCTATATTCACTATAC  | For         |                                          |
|                  | RI-4                | GACTTCTACTTATGAAGAACTCAATTGTG  | For         |                                          |

|                   |         |                                |     |                                |
|-------------------|---------|--------------------------------|-----|--------------------------------|
|                   | RI-5    | GATCCCATTGAGTGGGATTCAGA        | For |                                |
|                   | IR-3    | GAATAGCTTCAGGCAATCCCGTG        | Rev |                                |
|                   | RI-9    | ATTGCATTTGCAGGTAAAAGAGTAATTGA  | For | 45x, A58°C 0,45m, E 72°C 1,5m  |
|                   | RI-7    | GATTGCCTGAAGCTATTCAAACAGG      | For |                                |
|                   | psaI    | TGAAGAAATAAAGAAGCCATTGC        | Rev |                                |
|                   | rbcL-B  | GAAGCATGTGTACAAGCTCGTAATG      | For | 45x, A58°C 0,45m, E 72°C 1,5m  |
|                   | RI-1    | ACGTCCTTTTCGTTTCGTGTTGC        | For |                                |
|                   | IR-5    | GATGTCATCAACGAAAAGAGGCAATTC    | Rev |                                |
|                   | RI-6    | CTCTACTTAGCACTCCTTGCATCTC      | For | 45x, A58°C 0,45m, E 72°C 1,5m  |
|                   | psaI    | TGAAGAAATAAAGAAGCCATTGC        | Rev |                                |
|                   | RI-5    | GATCCCATTGAGTGGGATTCAGA        | For | 45x, A58°C 1m, E 72°C 2m       |
|                   | IR-4    | CTATCCAGATACGCAAGACAAAGAGC     | Rev |                                |
| <i>rbcL-rps18</i> | rbcL-B, | GAAGCATGTGTACAAGCTCGTAATG      | For | 45x, A 56°C 0,45m, E 72°C 1,5m |
|                   | rps18   | GTTTTAAAGTCACTCTATTCACCCGTCTAG | Rev | 45x, A 54°C 0,45m, E 72°C 1,5m |
|                   | rbcL-B2 | GTGCCGTAGCTAATCGAGTAGC         | For | 40x, A 54°C 0,45m, E 72°C 1,5m |
|                   | RI-1.1  | ACGTCCTTTTCGTTTCGTGTTGC        | For | 40x, A 54°C 1m, E 72°C 1,45m   |
|                   | R18-1   | GAGTTCATAATCCTAGTGATTAGTCCT    | For | 40x, A 54°C 1m, E 72°C 1,5m    |
|                   | 18R-1   | GTTGAATGAATATCTGCTGCCGCGTC     | Rev | 38x, A 54°C 1m, E 72°C 1,5m    |
| <i>rpoA-ycf2</i>  | rpoA-f  | ATAGATGCCGTCTTCACACCC          | Rev | 40x, A 54°C 1,5m, E 72°C 3,5m  |
|                   | ycf2-f  | GATGGATTTTCCCGGATGAAATGAAA     | For |                                |
| <i>rpoA-petB</i>  | petB_f  | CTTAGCGCTGTATTTATGTTAATCC      | For | 40x, A 54°C 1,5m, E 72°C 3,5m  |
|                   | rpoA-f  | ATAGATGCCGTCTTCACACCC          | Rev |                                |
| <i>rps18-psaJ</i> | rbcL-B  | GAAGCATGTGTACAAGCTCGTAATG      | For | 38x, A 54°C 1,5m, E 72°C 4m    |
|                   | psaJ    | GCAGGTCTATTGATAGAGATTAA        | For |                                |
|                   | rps18   | CTAGACGGGTGAATAGAGTGACTTTAAAAC | For | 45x, A 56°C 1,5, E 72°C 4m     |
|                   | psaJ    | GCAGGTCTATTGATAGAGATTAA        | For | 40x, A 54°C 1,5m, E 72°C 3,5m  |
|                   |         |                                |     | 38x, A 54°C 1,5m, E 72°C 3,5m  |
|                   | RJ-1    | CTACCTACTATCCACACGAGGATAATC    | For | 45x, A 56°C 1m, E 72°C 2m      |
|                   | psaJ    | GCAGGTCTATTGATAGAGATTAA        | For | 45x, A 54°C 1m, E 72°C 2m      |
|                   | J18-1   | CGTTGTATATCTTCCCAATTGTCTAC     | For | 45x, A 54°C 1m, E 72°C 2,5m    |
|                   | J18-2.1 | TGTATTCATTGGTTGTACAGATAGAGG    | For | 45x, A 54°C 1m, E 72°C 2,5m    |
|                   | J18-2.2 | CGGCTGTGCTATCATTCTTCTACC       | For | 45x, A 54°C 0,45m, E 72°C 1,5m |
|                   |         |                                |     | 43x, A 54°C 0,45m, E 72°C 2,5m |
|                   |         |                                |     | 40x, A 54°C 0,45m, E 72°C 2,5m |
|                   | R18-1   | GAGTTCATAATCCTAGTGATTAGTCCT    | For | 45x, A 54°C 1m, E 72°C 2,5m    |
|                   | psaJ    | GCAGGTCTATTGATAGAGATTAA        | For |                                |
|                   | rps18V  | CGCACTGAATTTATCGCAACCAAG       | For | 40x, A 54°C 0,45m, E 72°C 2,5m |

|                    |           |                                |     |                                |
|--------------------|-----------|--------------------------------|-----|--------------------------------|
|                    | rps18H    | CGAGCTAGCAATTATCCGACACGCC      | Rev |                                |
|                    | rps18V2   | GGCTACGCACTGAATTTATCGC         | For |                                |
| <i>rps18-psaI</i>  | rps18     | GTTTTAAAGTCACTCTATTCACCCGTCTAG | For | 45x, A 54°C 0,45m, E 72°C 1,5m |
|                    | psaI-2    | GCAAATGCCGGAATACTAGGC          | Rev | 40x, A54°C 0,45m, E 72°C 2,5m  |
|                    | rps18V    | CGCACTGAATTTATCGCAACCAAG       | For |                                |
|                    | R18-1     | GAGTTCATAATCCTAGTGATTAGTCCT    | For | 45x, A 54°C 1m, E 72°C 2,5m    |
|                    | psaI,     | TGAAGAAATAAAGAAGCCATTGC        | Rev | 40x, A 54°C 0,45m, E 72°C 1,5m |
|                    | psaI-2    | GCAAATGCCGGAATACTAGGC          | Rev |                                |
|                    | rps18-1.1 | CGCACTGAATTTATCGCAACCAAG       | For | 40x, A 54°C 0,45m, E 72°C 2,5m |
|                    | R0        | CGAGCTAGCAATTATCCGACACGCC      | Rev |                                |
|                    | rps18-1.2 | GGCTACGCACTGAATTTATCGC         | For |                                |
|                    | rps18     | GTTTTAAAGTCACTCTATTCACCCGTCTAG | For | 45x, A 58°C 1m, E 72°C 2,5m    |
|                    | psaI      | TGAAGAAATAAAGAAGCCATTGC        | Rev | 45x, A 56°C 0,45m, E 72°C 2m   |
|                    | rps18-1.1 | CGCACTGAATTTATCGCAACCAAG       | For | 45x, A 56°C 0,45m, E 72°C 1,5m |
|                    | rps18-1.2 | GGCTACGCACTGAATTTATCGC         | For | 45x, A 54°C 0,45m, E 72°C 2,5m |
|                    | rps18-1.3 | CTAGACGGGTGAATAGAGTGAC         | For | 45x, A 54°C 1m, E 72°C 2,5m    |
|                    | 18I-1     | CCG GTAGAAAGSGATTTCCCTAATG     | For | 45x, A 54°C 1m, E 72°C 2,5m    |
|                    | 18I-2     | GTAGAAAGSGATTTCCCTAATG         | For | 45x, A 54°C 0,45m, E 72°C 1,5m |
|                    | 18I-3     | GTTCAAGGTACGCGATCCA            | For | 45x, A 54°C 0,45m, E 72°C 2m   |
|                    | psaI-2    | GCAAATGCCGGAATACTAGGC          | Rev | 43x, A 54°C 0,45m, E 72°C 2,5m |
|                    | I18-1     | CATTTCTCCGAAGGTCGCTTTCTC       | Rev | 40x, A 54°C 0,45m, E 72°C 2m   |
|                    | I18-2     | AGATACGCAAGACAAAGAGCAT         | Rev |                                |
|                    | I18-3     | CTTCCAGTCTTCTGCCATTATACCCAG    | Rev |                                |
|                    | I18-4     | GAAATTGAAATTCACAAGACTGTCCG     | Rev |                                |
|                    | I18-5     | GACTTGCCAATCCAATTCTTTG         | Rev |                                |
|                    | I18-6     | TGGTAAGGGTATTGAGGCTAA          | Rev |                                |
| <i>rps18-rpl20</i> | rps18     | CTAGACGGGTGAATAGAGTGACTTTAAAAC | For | 38x, A 54°C 0,45m, E 72°C 3m   |
|                    | rpl20     | CTTGCACAAATAGCTATCTCAAATAGG    | For | 38x, A 54°C 0,45m, E 72°C 2m   |
|                    |           |                                |     | 45x, A 56°C 0,45m, E 72°C 1,5m |
|                    |           |                                |     | 45x, A 58°C 0,45m, E 72°C 1,5m |
|                    | rps18     | GTTTTAAAGTCACTCTATTCACCCGTCTAG | Rev | 38x, A 54°C 0,45m, E 72°C 3m   |
|                    | psaJ      | GCAGGTCTATTGATAGAGATTAA        | For | 45x, A56°C 1m, E 72°C 1,5m     |
|                    |           |                                |     | 40x, A 54°C 0,45m, E 72°C 1m   |
|                    | psaJ      | GCAGGTCTATTGATAGAGATTAA        | For | 38x, A 54°C 0,45m, E 72°C 3m   |
|                    | rpl20     | CTTGCACAAATAGCTATCTCAAATAGG    | For | 38x, A 54°C 0,45m, E 72°C 2m   |
|                    |           |                                |     | 45x, A 56°C 0,45m, E 72°C 1,5m |
| <i>psaI-ndhF</i>   | ndhF      | GATGCGCGAGTTATTGATGGAATTAC     | For | 38x, A54°C 1,5m, E 72°C 3,5m   |

|                    |         |                                    |     |                                |
|--------------------|---------|------------------------------------|-----|--------------------------------|
|                    | psaI    | TGAAGAAATAAAGAAGCCATTGC            | Rev |                                |
|                    | ndhF-2  | GAGTTACGAAGGAACTTCGAGC             | For | 45x, A 56°C 0,45m, E 72°C 2m   |
|                    | psaI    | TGAAGAAATAAAGAAGCCATTGC            | Rev | 45x, A 56°C 1m, E 72°C 1,5m    |
|                    | trnN    | GACTGGTCGTAGGTTCGAATC              | For | 45x, A 54°C 1m, E 72°C 1,5m    |
|                    | trnN-2  | CCTCAGTAGCTCAGTGGTAGAGC            | For | 45x, A 54°C 0,45m, E 72°C 1,5m |
|                    | trnN-3  | TTCGGCTGTTAACCGACTG                | For | 40x, A 54°C 0,40m, E 72°C 1m   |
|                    | psaI-2  | GCAAATGCCGGAATACTAGGC              | Rev | 40x, A 54°C 0,45m, E 72°C 1m   |
|                    | IN-1    | GTTGAATTTCGAAAGGCTCTCATCACTG       | Rev | 40x, A 54°C 0,45m, E 72°C 1,2m |
| <i>psaJ-ndhF</i>   | ndhF    | GATGCGCGAGTTATTGATGGAATTAC         | For | 45x, A 56°C 1m, E 72°C 1,5m    |
|                    | psaJ    | GCAGGTCTATTGATAGAGATTAA            | For | 45x, A 54°C 1m, E 72°C 1,5m    |
|                    | ndhF-22 | GAGTTACGAAGGAACTTCGAGC             | For |                                |
|                    | ndhF    | GATGCGCGAGTTATTGATGGAATTAC         | For | 45x, A 54°C 0,45m, E 72°C 1,5m |
|                    | psaJ    | GCAGGTCTATTGATAGAGATTAA            | For | 45x, A 56°C 0,45m, E 72°C 1,5m |
|                    | ndhF-2  | GAGTTACGAAGGAACTTCGAGC             | For | 40x, A 54°C 0,45m, E 72°C 1,5m |
|                    | trnN    | GACTGGTCGTAGGTTCGAATC              | For | 40x, A 54°C 0,45m, E 72°C 1,2m |
|                    | trnN-2  | CCTCAGTAGCTCAGTGGTAGAGC            | For | 40x, A 54°C 1m, E 72°C 2,5m    |
|                    | trnN-3  | TTCGGCTGTTAACCGACTG                | For | 40x, A 54°C 0,45m, E 72°C 2,5m |
|                    | rps18   | CTAGACGGGTGAATAGAGTGACTTTAAAAC     | For |                                |
|                    | JN-1    | CATGTCAGACTATATCTTCGATCTTTAAGTG    |     |                                |
|                    | JN-2    | CGTCACCTATGGCGTTCTTCCGAACG         |     |                                |
| <i>trnN-ndhF</i>   | ndhF    | GATGCGCGAGTTATTGATGGAATTAC         | For | 38x, A 54°C 0,45m, E 72°C 1,5m |
|                    | trnN    | GCTCTACCACTGAGCTACTGAGG            | Rev | 45x, A 56°C 0,45m, E 72°C 1,5m |
| <i>rpl20-rpl32</i> | rpl20   | CTTGACAAATAGCTATCTCAAATAGG         | For | 40x, A 54°C 0,45m, E 72°C 1,5m |
|                    | rpl32   | CAAAGCTTTCAACGCCGCCCAATG           | Rev | 45x, A 56°C 0,45m, E 72°C 1,5m |
|                    | rpl20-2 | GATTTTCGTCGTTTGTGGATCACTC          | For | 45x, A 60°C 0,45m, E 72°C 1,5m |
|                    | rpl32   | CAAAGCTTTCAACGCCGCCCAATG           | Rev | 45x, A 54°C 0,45m, E 72°C 1,5m |
| <i>ndhF-rpl32</i>  | ndhF    | GCATAATCCATGAATATTGATATATATGTTCCAT | Rev | 40x, A 54°C 0,45m, E 72°C 1,5m |
|                    | rpl32   | CAAAGCTTTCAACGCCGCCCAATG           | Rev | 45x, A 56°C 0,45m, E 72°C 1,5m |
|                    |         |                                    |     | 45x, A 54°C 0,45m, E 72°C 1,5m |
|                    | ndhF    | GATGCGCGAGTTATTGATGGAATTAC         | For | 40x, A 54°C 0,45m, E 72°C 1,5m |
|                    | rpl32   | CAAAGCTTTCAACGCCGCCCAATG           | Rev | 45x, A 56°C 0,45m, E 72°C 1,5m |
|                    |         |                                    |     | 45x, A 54°C 0,45m, E 72°C 1,5m |
|                    | ndhF    | GATGCGCGAGTTATTGATGGAATTAC         | Rev | 38x, A 54°C 0,45m, E 72°C 1,5m |
|                    | trnN-2  | CCTCAGTAGCTCAGTGGTAGAGC            | For |                                |

Primers under the primary primer pair are internal primers used additionally for sequencing.

**Table S4.** Reconstructed gene order of 111 unique plastid genes in *Pelargonium*.

| Subgroup                                                 | Genome arrangement                                                                                                                                                                                                                                                                                                                                                                                                                                                                |
|----------------------------------------------------------|-----------------------------------------------------------------------------------------------------------------------------------------------------------------------------------------------------------------------------------------------------------------------------------------------------------------------------------------------------------------------------------------------------------------------------------------------------------------------------------|
| Subg.<br><i>Magnipetala</i><br>and<br><i>Pelargonium</i> | <b>86 -85 84</b> -1 -2 -3 -4 -5 -6 7 8 -9 10 11 -12 -13 -14 -15 -16 -17 -18 -19 20<br>21 -22 -23 <u>-24 -25 -30 35 34 33 32 31 26 27 -28 29 36 -37</u> -38 39 40 -41 -<br>42 -43 -44 45 -46 -47 <u>48 49</u> 50 51 52 -53 -54 -55 -56 57 58 -59 -60 <u>61 62</u><br><u>63 -64 -65 -66 67 68 -69 70 71 72 -73 -74 -75 -76 -77 -78 -79 -80 -81 -82</u><br><b>-83 -87</b> -88 -89 90 91 92 93 94 95 96 97 <u>-98 -99 100 111 110 109 108</u><br><b>107 106 105 104 103 -102 -101</b> |
| Subg.<br><i>Paucisignata</i>                             | <b>84 -1 -2</b> -3 -4 -5 -6 7 8 -9 10 11 -12 -13 -14 -15 -16 -17 -18 -19 20 21 -22<br>-23 -24 -25 <b>-30 35 34 33 32 62 31 26 27 -28 29 36 -37</b> -38 39 40 -41 -42 -<br>43 -44 45 -46 -47 <u>48 63 -61 60 59 -58 -57 56 55 54 53 -52 -51 -50 -49 -</u><br><u>98 -99 -97 -96 -95 -94 -93 -92 -91 -90 89 88 87 83 82 81 80 79 78 77 76</u><br><u>75 74 73 86 85 -72 -71 -70 69 -68 -67 66 65 64 100 111 110 109</u> 101 102<br>-103 -104 -105 -106 -107 -108                      |
| Group C                                                  | <b>84 -1 -2</b> -3 -4 -5 -6 7 8 -9 10 11 -12 -13 -14 -15 -16 -17 -18 -19 20 21 -22<br>-23 -24 -25 <b>-30 35 34 33 32 62 31 26 27 -28 29 36 -37</b> -38 39 40 -41 -42 -<br>43 -44 45 -46 -47 <u>48 63 -61 60 59 -58 -57 55 56 54 53 -52 -51 -50 -49 -</u><br><u>98 -99 -97 -96 -95 -94 -93 -92 -91 -90 89 88 87 83 82 81 80 79 78 77 76</u><br><u>75 74 73 86 85 -72 -71 -70 69 -68 -67 66 65 64 100 111 110 109</u> 101 102<br>-103 -104 -105 -106 -107 -108                      |
| Group S                                                  | <b>84 -1 -2</b> -3 -4 -5 -6 7 8 -9 10 11 -12 -13 -14 -15 -16 -17 -18 -19 20 21 -22<br>-23 -24 -25 <b>-30 35 34 33 32 62 31 26 27 -28 29 36 -37</b> -38 39 40 -41 -42 -<br>43 -44 45 -46 -47 <u>48 63 49 50 51 52 -53 -54 -55 -56 57 58 -59 -60 61 -98</u><br><u>-99 -97 -96 -95 -94 -93 -92 -91 -90 89 88 87 83 82 81 80 79 78 77 76 75</u><br><u>74 73 86 85 -72 -71 -70 69 -68 -67 66 65 64 100 111 110 109</u> 101 102 -<br>103 -104 -105 -106 -107 -108                       |
| Subg.<br><i>Parvulipetala</i>                            | <b>86 -85 84</b> -1 -2 -3 -4 -5 -6 7 8 -9 10 11 -12 -13 -14 -15 -16 -17 -18 -19 20<br>21 -22 -23 -24 -25 <b>-30 35 34 33 32 31 26 27 -28 29 36 -37</b> -38 39 40 -41 -<br>42 -43 -44 45 -46 -47 <u>48 49</u> 50 51 52 -53 -54 -55 -56 57 58 -59 -60 <u>61 62</u><br><u>63 -64 -65 -66 67 68 -69 70 71 72 -73 -74 -75 -76 -77 -78 -79 -80 -81 -82</u><br><b>-83 -87</b> -88 -89 90 91 92 93 94 95 96 97 <u>99 98 100 111 110 109 108 107</u><br><b>106 105 104 103 -102 -101</b>   |

Bold numbers – genes with an altered position compared to *Melianthus*; +/- – strand orientation; underlined numbers – regions covered in PCR-screening; Gene codes: 1=*trnH*<sub>GUG</sub>; 2=*psbA*; 3=*matK*; 4=*trnK*<sub>UUU</sub>; 5=*rps16*; 6=*trnQ*<sub>UUG</sub>; 7=*psbK*; 8=*psbI*; 9=*trnS*<sub>GCU</sub>; 10=*trnG*<sub>UCC</sub>; 11=*trnR*<sub>UCU</sub>; 12=*atpA*; 13=*atpF*; 14=*atpH*; 15=*atpI*; 16=*rps2*; 17=*rpoC2*; 18=*rpoC1*; 19=*rpoB*; 20=*trnC*<sub>GCA</sub>; 21=*petN*; 22=*psbM*; 23=*trnD*<sub>GUC</sub>; 24=*trnY*<sub>GUA</sub>; 25=*trnE*<sub>UUC</sub>; 26=*psbD*; 27=*psbC*; 28=*trnS*<sub>UGA</sub>; 29=*psbZ*; 30=*trnG*<sub>GCC</sub>; 31=*trnM*<sub>CAU</sub>; 32=*rps14*; 33=*psaB*; 34=*psaA*; 35=*ycf3*; 36=*trnS*<sub>GGA</sub>; 37=*rps4*; 38=*trnT*<sub>UGU</sub>; 39=*trnL*<sub>UAA</sub>; 40=*trnF*<sub>GAA</sub>; 41=*ndhJ*; 42=*ndhK*; 43=*ndhC*; 44=*trnV*<sub>UAC</sub>; 45=*trnM*<sub>CAU</sub>; 46=*atpE*; 47=*atpB*; 48=*rbcL*; 49=*psaI*; 50=*ycf4*; 51=*cemA*; 52=*petA*; 53=*psbJ*; 54=*psbL*; 55=*psbF*; 56=*psbE*; 57=*petL*; 58=*petG*; 59=*trnW*<sub>CCA</sub>; 60=*trnP*<sub>UGG</sub>; 61=*psaJ*; 62=*rpl33*; 63=*rps18*; 64=*rpl20*; 65=*rps12* '5; 66=*clpP*; 67=*psbB*; 68=*psbT*; 69=*psbN*; 70=*psbH*; 71=*petB*; 72=*petD*; 73=*rpoA*; 74=*rps11*; 75=*rpl36*; 76=*rps8*; 77=*rpl14*; 78=*rpl16*; 79=*rps3*; 80=*rpl22*; 81=*rps19*; 82=*rpl2*; 83=*rpl23*; 84=*trnI*<sub>CAU</sub>; 85=*ycf2*; 86=*trnL*<sub>CAA</sub>; 87=*ndhB*; 88=*rps7*; 89=*rps12* '3; 90=*trnV*<sub>GAC</sub>; 91=*rrn16*; 92=*trnI*<sub>GAU</sub>; 93=*trnA*<sub>UGC</sub>; 94=*rrn23*; 95=*rrn4.5*; 96=*rrn5*; 97=*trnR*<sub>ACG</sub>; 98=*trnN*<sub>GUU</sub>; 99=*ndhF*; 100=*rpl32*; 101=*trnL*<sub>UAG</sub>; 102=*ccsA*; 103=*ndhD*; 104=*psaC*; 105=*ndhE*; 106=*ndhG*; 107=*ndhI*; 108=*ndhA*; 109=*ndhH*; 110=*rps15*; 111=*ycf1*.

**Table S5.** Length range and mean (brackets) for 10 plastome regions of *Pelargonium*.

| Subgenus                         | <i>psbZ-rps4</i>    | <i>rbcL-psaI</i>    | <i>rbcL-rps18</i>   | 18S spacer- <i>psaJ</i> | 18s spacer- <i>psaI</i> | <i>rps18-rpl20</i> | <i>psaI-ndhF</i>    | <i>psaJ-ndhF</i>    | <i>ndhF-rpl32</i> | <i>rpl20-rpl32</i> |
|----------------------------------|---------------------|---------------------|---------------------|-------------------------|-------------------------|--------------------|---------------------|---------------------|-------------------|--------------------|
| <i>Pelargonium</i>               | 1037-1262<br>(1222) | 4382-5258<br>(4780) | -                   | -                       | -                       | 456-475<br>(459)   | -                   | -                   | 520-897<br>(602)  | -                  |
| <i>Parvulipetala</i>             | 870-1029<br>(915)   | 3770-4013<br>(3922) | -                   | -                       | -                       | 475-653 (505)      | -                   | -                   | 869-881<br>(876)  | -                  |
| <i>Magnipetala</i>               | 1106-1139<br>(1119) | 1219-3849<br>(3129) | -                   | -                       | -                       | 420-475<br>(453)   | -                   | -                   | 408-869<br>(508)  | -                  |
| <i>Paucisignata</i> ,<br>Group C | 1256-1271<br>(1261) | -                   | 2261-2425<br>(2236) | 1329-3222<br>(2345)     | -                       | -                  | 2684-3477<br>(2911) | -                   | -                 | 701-713<br>(703)   |
| <i>Paucisignata</i> ,<br>Group S | 668-1271<br>(1005)  | -                   | 1674-2163<br>(1937) | -                       | 1786-2460<br>(2142)     | -                  | -                   | 1836-5111<br>(2441) | -                 | 702-1312<br>(929)  |

**Table S6.** Substitution rate, nucleotide divergence, and GC-content in unaltered and rearranged plastome regions.

|                             | Conserved regions | Rearranged regions | <i>Pelargonium</i> | <i>Parvulipetala</i> | <i>Magnipetala</i> | <i>Paucisignata</i> ,<br>Group C | <i>Paucisignata</i> ,<br>Group S |
|-----------------------------|-------------------|--------------------|--------------------|----------------------|--------------------|----------------------------------|----------------------------------|
| GC content [%]              | 34.8              | 38.3               | 34.2               | 37.6                 | 36.1               | 38.7                             | 38.0                             |
| Divergence [%]              | 2.9               | 3.3                | 2.2                | 1.4                  | 4.1                | 2.5                              | 5.2                              |
| Substitution rate [ $\mu$ ] | 0.0078            | 0.0098             | 0.0064             | 0.0041               | 0.0086             | 0.0082                           | 0.016                            |

**Table S7.** Average length, number, and proportion [%] of repeat-rich segments of accD-like regions.

|                                           | <b>Total Length</b> | <b>Sum <i>accD</i></b> | <b><i>accD1</i><br/>(range)</b> | <b><i>accD2</i><br/>(range)</b> | <b><i>accD3</i><br/>(range)</b> | <b>Interspersed<br/>region 1<br/>(%length<br/>repeats)</b> | <b>Interspersed<br/>region 2<br/>(% length<br/>repeats)</b> |
|-------------------------------------------|---------------------|------------------------|---------------------------------|---------------------------------|---------------------------------|------------------------------------------------------------|-------------------------------------------------------------|
| <i>Pelargonium</i>                        | 3285                | 1167                   | 322<br>(318-324)                | 211<br>(211-211)                | 634<br>(634-634)                | 728 (34)                                                   | 1390 (53)                                                   |
| <i>Parvulipetala</i>                      | 2827                | 887                    | 42<br>(42-42)                   | 211<br>(211-211)                | 634<br>(634-634)                | 806 (37)                                                   | 1134 (43)                                                   |
| <i>Magnipetala</i>                        | 2304                | 1089                   | 277<br>(88-317)                 | 182<br>(153-211)                | 630<br>(595-654)                | 314 (0)                                                    | 901 (12)                                                    |
| <b>Subclade of<br/><i>Magnipetala</i></b> | 234                 | 234                    | -                               | -                               | 234<br>(234-234)                | -                                                          | -                                                           |

**Table S8.** Summary statistics of sequence comparison for accD segments from blastN analysis.

| <b>Subgenus</b>      | <b><i>accD1</i></b> |                         |                        | <b><i>accD2</i></b> |                         |                        | <b><i>accD3</i></b> |                         |                        |
|----------------------|---------------------|-------------------------|------------------------|---------------------|-------------------------|------------------------|---------------------|-------------------------|------------------------|
|                      | <b>E value</b>      | <b>Identity<br/>[%]</b> | <b>Length<br/>[nt]</b> | <b>E value</b>      | <b>Identity<br/>[%]</b> | <b>Length<br/>[nt]</b> | <b>E value</b>      | <b>Identity<br/>[%]</b> | <b>Length<br/>[nt]</b> |
| <i>Pelargonium</i>   | 3.E-09              | 69                      | 319                    | 0.8                 | 67                      | 185                    | 5.E-135             | 79                      | 599                    |
| <i>Parvulipetala</i> | -                   | -                       | -                      | 1.4                 | 67                      | 199                    | 4.E-140             | 78                      | 604                    |
| <i>Magnipetala</i>   | 2.E-04              | 70                      | 196                    | 0.1                 | 68                      | 154                    | 8.E-119             | 76                      | 587                    |
